# Supplementary material for: Maternal High Fat Diet and in-Utero Metformin Exposure Significantly Impact upon the Fetal Renal Proteome of Male Mice
Source: MDPI journal article supplement (doi:10.3390/jcm8050663), 2019-05-11
Supplement: s1 [file s1]

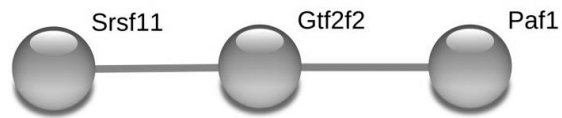

**Figure S1.** Overlap cluster of three proteins significantly and relevantly ( $q < 0.05$ ,  $fc \geq 1.5$ ) altered in fetal kidneys both by high fat diet (HFD compared to SD group) and by metformin during standard diet (SD-M compared to SD group) as identified by String analysis is shown. Srsf11, 60S ribosomal protein L23; Gtf2f2, Cingulin; Paf1, Integral membrane protein 2B.

**Table S1.** Overlaps of proteins significantly and relevantly ( $q < 0.05$ ,  $fc \geq 1.5$ ) altered in fetal kidneys both by high fat diet (HFD compared to SD group) and by metformin during standard diet (SD-M compared to SD group) are shown.

| Protein ID | Protein name                                            | q-value   |            | Fold change |            | Gene name |
|------------|---------------------------------------------------------|-----------|------------|-------------|------------|-----------|
|            |                                                         | HFD vs SD | SD-M vs SD | HFD vs SD   | SD-M vs SD |           |
| P62830     | 60S ribosomal protein L23                               | <0.001    | <0.05      | 65.0        | 106.8      | Rpl23     |
| Q07456     | Protein AMBP                                            | <0.05     | <0.05      | 32.1        | 31.4       | Ambp      |
| O55125     | Protein NipSnap homolog 1                               | <0.05     | <0.001     | 16.5        | 16.6       | Nipsnap1  |
| Q9D2U9     | Histone H2B type 3-A                                    | <0.001    | <0.05      | 12.0        | 13.6       | Hist3h2ba |
| Q9EP89     | Serine beta-lactamase-like protein LACTB, mitochondrial | <0.05     | <0.05      | 9.1         | 9.0        | Lactb     |
| Q9D706     | RNA polymerase II-associated protein 3                  | <0.05     | <0.05      | 7.2         | 8.2        | Rpap3     |
| Q8K2T8     | RNA polymerase II-associated factor 1 homolog           | <0.05     | <0.05      | 5.0         | 7.9        | Paf1      |
| Q3ULB1     | Testin                                                  | <0.05     | <0.05      | 6.0         | 6.1        | Tes       |
| O88665     | Bromodomain-containing protein 7                        | <0.001    | <0.05      | 4.3         | 5.3        | Brd7      |
| Q9JIK9     | 28S ribosomal protein S34, mitochondrial                | <0.05     | <0.05      | 3.9         | 5.1        | Mrps34    |
| Q3UIX4     | Serine and arginine rich splicing factor 11             | <0.05     | <0.05      | 4.1         | 5.0        | Srsf11    |
| Q8R0A0     | General transcription factor IIF subunit 2              | <0.05     | <0.05      | 3.6         | 4.2        | Gtf2f2    |
| E9QMC1     | Cingulin                                                | <0.05     | <0.05      | 4.0         | 3.7        | Cgn       |
| O55106     | Striatin                                                | <0.05     | <0.05      | 3.0         | 3.5        | Strn      |
| O89051     | Integral membrane protein 2B                            | <0.05     | <0.001     | 3.4         | 3.4        | Itm2b     |
| Q80YE7     | Death-associated protein kinase 1                       | <0.001    | <0.05      | -48.7       | -48.7      | Dapk1     |

HFD, high fat diet without metformin; SD, standard diet without metformin; SD-M, standard diet with metformin; vs, compared to; fc, fold change: positive values indicate up-regulation in the respective group comparisons, negative values indicate down-regulation.

**Table S2.** Overlaps of proteins considerably and relevantly altered ( $q < 0.1$ ,  $fc \geq 1.5$ ) in fetal kidneys both by high fat diet (HFD compared to SD group) and by metformin during high fat diet (HFD-M compared to HFD group) are shown.

| Protein ID | Protein name                                                | q-value   |              | Fold change |              | Gene name      |
|------------|-------------------------------------------------------------|-----------|--------------|-------------|--------------|----------------|
|            |                                                             | HFD vs SD | HFD-M vs HFD | HFD vs SD   | HFD-M vs HFD |                |
| K3W4R2     | Myosin-14                                                   | =0.05     | <0.1         | 15.7        | -15.4        | Myh14          |
| Q9CR51     | V-type proton ATPase subunit G 1                            | <0.05     | <0.1         | 14.3        | -14.6        | Atp6v1g1       |
| A0A0G2JE32 | Ubiquitin-conjugating enzyme E2 D3                          | <0.1      | <0.1         | 13.0        | -18.0        | Ube2d3         |
| A0A1L1SUX8 | Thy-1 membrane glycoprotein                                 | <0.05     | <0.1         | 10.0        | -9.0         | Thy1           |
| Q922W5     | Pyrroline-5-carboxylate reductase 1, mitochondrial          | <0.1      | =0.05        | 6.0         | -10.1        | Pycr1          |
| P28667     | MARCKS-related protein                                      | <0.1      | <0.1         | 5.3         | -9.4         | Marcksl1       |
| Q3UI43     | BRISC and BRCA1-A complex member 1                          | =0.05     | <0.1         | 3.2         | -3.2         | Babam1         |
| E9PZY8     | Protein virilizer homolog                                   | <0.05     | <0.1         | -2.1        | 1.9          | 1110037F02 Rik |
| Q4VA93     | Protein kinase C                                            | <0.05     | <0.1         | -3.0        | 2.6          | Prkca          |
| Q9CQZ6     | NADH dehydrogenase [ubiquinone] 1 beta subcomplex subunit 3 | <0.001    | <0.1         | -9.6        | 9.1          | Ndubf3         |
| D3YZN4     | Paraplegin                                                  | <0.001    | <0.1         | -12.3       | 14.0         | Spg7           |

HFD, high fat diet without metformin; SD, standard diet without metformin; SD-M, standard diet with metformin; vs, compared to; fc, fold change: positive values indicate up-regulation in the respective group comparisons, negative values indicate down-regulation.
